# Supplementary material for: Understanding the Influences of Multiscale Waviness on the Elastohydrodynamic Lubrication Performance, Part II: The Partial-Film Condition
Source: Preprints.org preprint supplement (doi:10.20944/preprints202404.1568.v1), 2024-04-25

This folder includes two files. One is 'Contour plots.docx,' showing all the contour maps. Another is 'Results\_all\_X\_partial.mat', containing all the simulated results and using Matlab to open this file. The structure of variable **Results\_all\_X\_partial** is shown below:

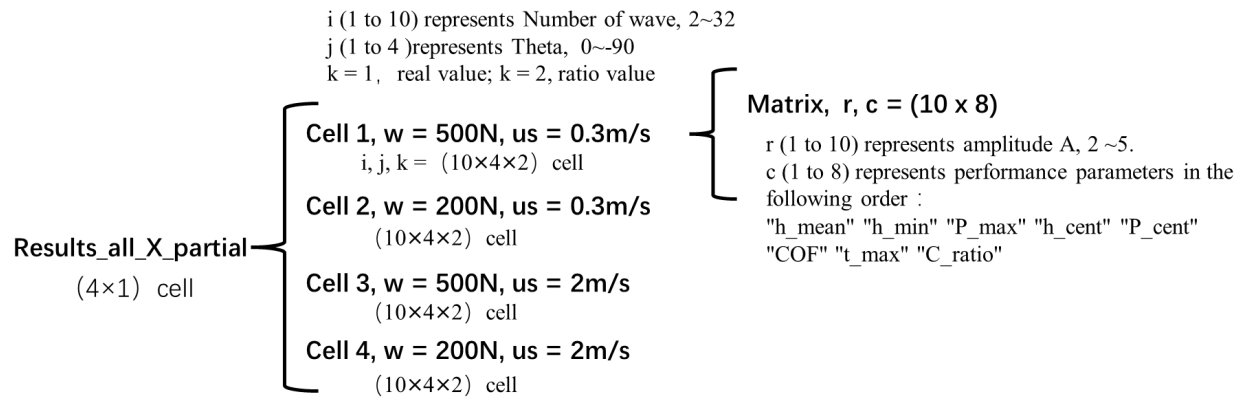

Supplement: Supplementary file 1 [file supplementary]
