# Supplementary material for: Understanding the Influences of Multiscale Waviness on the Elastohydrodynamic Lubrication Performance, Part II: The Partial-Film Condition
Source: Preprints.org preprint supplement (doi:10.20944/preprints202404.1568.v1), 2024-04-25
Supplement: Supplementary file 1 [file supplementary]

# W=500N, US = 0.3m/s, Theta0deg

# W=500N, US = 0.3m/s, Theta-30deg

# W=500N, US = 0.3m/s, Theta-60deg

# W=500N, US = 0.3m/s, Theta-90deg

# W=200N, US = 0.3m/s, Theta0deg

# W=200N, US = 0.3m/s, Theta-30deg

# W=200N, US = 0.3m/s, Theta-60deg

# W=200N, US = 0.3m/s, Theta-90deg

# W=500N, US = 2m/s, Theta0deg

# W=500N, US = 2m/s, Theta-30deg

# W=500N, US = 2m/s, Theta-60deg

# W=500N, US = 2m/s, Theta-90deg

# W=200N, US = 2m/s, Theta0deg

# W=200N, US = 2m/s, Theta-30deg

# W=200N, US = 2m/s, Theta-60deg

# W=200N, US = 2m/s, Theta-90deg
